# Supplementary material for: Ruthenium carbonyl complexes with pyridylalkanol ligands: synthesis, characterization and catalytic properties for aerobic oxidation of secondary alcohols
Source: Royal Society of Chemistry journal article supplement (doi:10.1039/c8nj00329g), 2018-01-01
Supplement: c8nj00329g1.pdf [file c8nj00329g1.pdf]

## Electronic Supplementary Information

### **Ruthenium Carbonyl Complexes with Pyridylalkanol ligands: Synthesis, Characterization and Catalytic Properties for Aerobic Oxidation of Secondary Alcohols**

Zhiqiang Hao,<sup>‡</sup> Ning Li,<sup>‡</sup> Xinlong Yan, Ying Li, Siqi Zong, Huating Liu,\* Zhangang Han and Jin Lin\*

National Demonstration Center for Experimental Chemistry Education,

The College of Chemistry and Material Science, Hebei Normal University, Shijiazhuang 050024, People's Republic of China

**Table S1** Aerobic oxidation of 1-phenylethanol catalyzed by complex **1a** with various of oxidants<sup>a</sup>

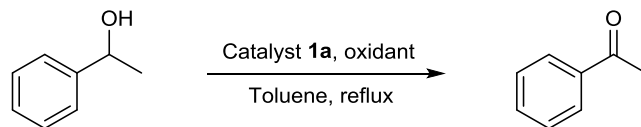

| Entry | Catalyst (mol%) | Oxidant                       | Solvent | Yield (%) <sup>b</sup> |
|-------|-----------------|-------------------------------|---------|------------------------|
| 1     | 2.5             | NMO                           | toluene | 67                     |
| 2     | 2.5             | H <sub>2</sub> O <sub>2</sub> | toluene | 59                     |
| 3     | 2.5             | Bu <sup>t</sup> OOH           | toluene | 62                     |

<sup>a</sup>Reaction conditions: 1-phenylethanol (1.0 mmol), toluene (5.0 mL), oxidant (2.5 mmol), reaction time 6 h.

**Table S2** Crystallographic data and structure refinement parameters for **1a**, **1c**, **1e**, **1g** and **1i**.

| Complex           | <b>1a</b>                                                                      | <b>1c</b>                                                                      | <b>1e</b>                                                                      | <b>1g</b>                                                                      | <b>1i</b>                                                                                      |
|-------------------|--------------------------------------------------------------------------------|--------------------------------------------------------------------------------|--------------------------------------------------------------------------------|--------------------------------------------------------------------------------|------------------------------------------------------------------------------------------------|
| Empirical formula | C <sub>28</sub> H <sub>24</sub> N <sub>2</sub> O <sub>10</sub> Ru <sub>3</sub> | C <sub>24</sub> H <sub>20</sub> N <sub>2</sub> O <sub>10</sub> Ru <sub>3</sub> | C <sub>32</sub> H <sub>20</sub> N <sub>2</sub> O <sub>10</sub> Ru <sub>3</sub> | C <sub>34</sub> H <sub>24</sub> N <sub>2</sub> O <sub>12</sub> Ru <sub>3</sub> | C <sub>32</sub> H <sub>18</sub> Br <sub>2</sub> N <sub>2</sub> O <sub>10</sub> Ru <sub>3</sub> |
| Formula weight    | 851.71                                                                         | 799.63                                                                         | 895.72                                                                         | 955.77                                                                         | 1053.51                                                                                        |

|                            |             |              |              |             |             |
|----------------------------|-------------|--------------|--------------|-------------|-------------|
| Temperature (K)            | 298(2)      | 298(2)       | 298(2)       | 298(2)      | 298(2)      |
| Crystal system             | Tetragonal  | Orthorhombic | Tetragonal   | Monoclinic  | Monoclinic  |
| Space group                | $P4_32_12$  | $P2_12_12_1$ | $I\bar{4}2d$ | $C2$        | $P2_1/n$    |
| $a$ (Å)                    | 12.0348(13) | 11.2284(9)   | 14.677(4)    | 37.380(3)   | 16.4503(14) |
| $b$ (Å)                    | 12.0348(13) | 15.3788(12)  | 14.677(4)    | 11.6310(11) | 10.8605(9)  |
| $c$ (Å)                    | 21.3648(17) | 15.7738(13)  | 29.911(16)   | 14.8401(12) | 20.7249(17) |
| $\alpha$ (°)               | 90          | 90           | 90           | 90          | 90          |
| $\beta$ (°)                | 90          | 90           | 90           | 94.3980(10) | 106.928(2)  |
| $\gamma$ (°)               | 90          | 90           | 90           | 90          | 90          |
| $V$ (Å <sup>3</sup> )      | 3094.4(5)   | 2723.8(4)    | 6443(4)      | 6433.0(10)  | 3542.2(5)   |
| $Z$                        | 4           | 4            | 8            | 6           | 4           |
| $F(000)$                   | 1672        | 1650         | 3504         | 2816        | 2024        |
| Dcalc (g/cm <sup>3</sup> ) | 1.828       | 1.950        | 1.847        | 1.096       | 1.975       |

|                              |                    |                    |                    |                    |                    |
|------------------------------|--------------------|--------------------|--------------------|--------------------|--------------------|
| Crystal dimensions (mm)      | 0.40 × 0.27 × 0.21 | 0.43 × 0.40 × 0.35 | 0.46 × 0.41 × 0.40 | 0.45 × 0.15 × 0.12 | 0.40 × 0.30 × 0.25 |
| $\theta$ Range (°)           | 2.39-25.02         | 2.58-25.02         | 2.39-25.01         | 2.32-25.02         | 2.28-25.02         |
| Reflections collected        | 15625/2735         | 13715/4803         | 15507/2846         | 16509/10515        | 17179/6233         |
| Independent reflections      | 2735               | 4803               | 2846               | 10515              | 6233               |
| $R_{\text{int}}$             | 0.0395             | 0.0235             | 0.0739             | 0.0755             | 0.0464             |
| Parameters                   | 195                | 357                | 213                | 693                | 443                |
| Goodness of fit on $F^2$     | 1.087              | 1.149              | 1.158              | 1.083              | 1.014              |
| $R_1, wR_2 [I > 2\sigma(I)]$ | 0.0335, 0.0784     | 0.0216, 0.0500     | 0.0466, 0.1069     | 0.0775, 0.1711     | 0.0399, 0.0835     |
| $R_1, wR_2$ (all data)       | 0.0482, 0.0884     | 0.0256, 0.0523     | 0.0764, 0.1323     | 0.1602, 0.1839     | 0.0717, 0.0941     |
| CCDC deposition no.          | 1492241            | 1485797            | 1487563            | 1518232            | 1492237            |

## NMR data for products

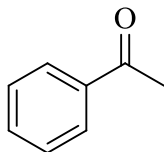

$^1\text{H}$  NMR (ppm in  $\text{CDCl}_3$ , 500 MHz):  $\delta$  2.56 (s, 3H,  $\text{CH}_3$ ), 7.42 (t,  $J = 7.5$  Hz, 2H, Ar-H), 7.52 (t,  $J = 7.5$  Hz, 1H, Ar-H), 7.92 (d,  $J = 7.5$  Hz, 2H, Ar-H).  $^{13}\text{C}$  NMR (ppm in  $\text{CDCl}_3$ , 125 MHz):  $\delta$  26.5, 128.3, 128.5, 133.1, 137.1, 198.0.

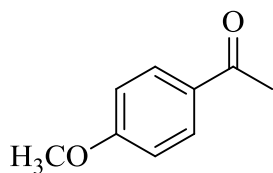

$^1\text{H}$  NMR (ppm in  $\text{CDCl}_3$ , 500 MHz):  $\delta$  2.56 (s, 3H,  $\text{CH}_3$ ), 3.87 (s, 3H,  $\text{OCH}_3$ ), 6.93 (d,  $J = 8.0$  Hz, 2H, Ar-H), 7.94 (d,  $J = 8.0$  Hz, 2H, Ar-H).  $^{13}\text{C}$  NMR (ppm in  $\text{CDCl}_3$ , 125 MHz):  $\delta$  26.3, 55.4, 113.7, 130.4, 130.6, 163.5, 196.7.

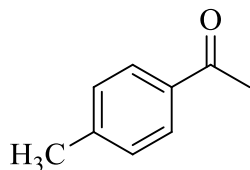

$^1\text{H}$  NMR (ppm in  $\text{CDCl}_3$ , 500 MHz):  $\delta$  2.37 (s, 3H,  $\text{CH}_3$ ), 2.55 (s, 3H,  $\text{CH}_3$ ), 7.22 (d,  $J = 8.0$  Hz, 2H, Ar-H), 7.84 (d,  $J = 8.0$  Hz, 2H, Ar-H).  $^{13}\text{C}$  NMR (ppm in  $\text{CDCl}_3$ , 125 MHz):  $\delta$  21.5, 26.4, 128.3, 129.3, 134.7, 143.8, 198.0.

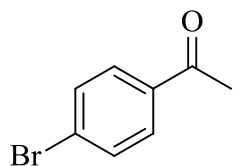

$^1\text{H}$  NMR (ppm in  $\text{CDCl}_3$ , 500 MHz):  $\delta$  2.60 (s, 3H,  $\text{CH}_3$ ), 7.61 (d,  $J = 8.5$  Hz, 2H, Ar-H), 7.83 (d,  $J = 8.5$  Hz, 2H, Ar-H).  $^{13}\text{C}$  NMR (ppm in  $\text{CDCl}_3$ , 125 MHz):  $\delta$  26.5, 128.3, 129.8, 131.9, 135.9, 197.0.

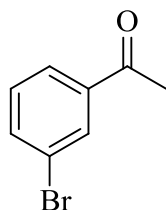

$^1\text{H}$  NMR (ppm in  $\text{CDCl}_3$ , 500 MHz):  $\delta$  2.57 (s, 3H,  $\text{CH}_3$ ), 7.32 (t,  $J = 8.0$  Hz, 1H, Ar-H), 7.66 (d,  $J = 8.0$  Hz, 1H, Ar-H), 7.85 (d,  $J = 8.0$  Hz, 1H, Ar-H), 8.05 (s, 1H, Ar-H).  $^{13}\text{C}$  NMR (ppm in  $\text{CDCl}_3$ , 125 MHz):  $\delta$  26.6, 122.9, 126.9, 130.2, 131.3, 135.9, 138.8, 196.5.

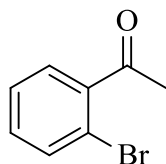

$^1\text{H}$  NMR (ppm in  $\text{CDCl}_3$ , 500 MHz):  $\delta$  2.63 (s, 3H,  $\text{CH}_3$ ), 7.29 (t,  $J = 7.5$  Hz, 1H, Ar-H), 7.36 (t,  $J = 8.5$  Hz, 1H, Ar-H), 7.48 (d,  $J = 8.5$  Hz, 1H, Ar-H), 7.61 (d,  $J = 7.0$  Hz, 1H, Ar-H).  $^{13}\text{C}$  NMR (ppm in  $\text{CDCl}_3$ , 125 MHz):  $\delta$  30.3, 118.9, 127.5, 128.9, 131.8, 133.8, 141.5, 200.1.

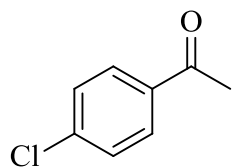

$^1\text{H NMR}$  (ppm in  $\text{CDCl}_3$ , 500 MHz):  $\delta$  2.57(s, 3H,  $\text{CH}_3$ ), 7.42 (d,  $J = 9.0$  Hz, 2H, Ar-H), 7.89 (d,  $J = 8.5$  Hz, 2H, Ar-H).  $^{13}\text{C NMR}$  (ppm in  $\text{CDCl}_3$ , 125 MHz):  $\delta$  26.5, 128.8, 129.7, 135.4, 139.5, 196.7.

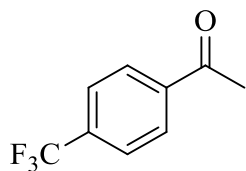

$^1\text{H NMR}$  (ppm in  $\text{CDCl}_3$ , 500 MHz):  $\delta$  2.67 (s, 3H,  $\text{CH}_3$ ), 7.75 (d,  $J = 8.0$  Hz, 2H, Ar-H), 8.08 (d,  $J = 8.0$  Hz, 2H, Ar-H).  $^{13}\text{C NMR}$  (ppm in  $\text{CDCl}_3$ , 125 MHz):  $\delta$  26.7, 125.2 (q,  $J = 272.5$  Hz), 125.7, 128.6, 134.3, 139.7, 196.9.

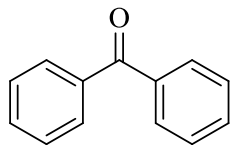

$^1\text{H NMR}$  (ppm in  $\text{CDCl}_3$ , 500 MHz):  $\delta$  7.50 (t,  $J = 7.5$  Hz, 4H, Ar-H), 7.61 (t,  $J = 7.5$  Hz, 2H, Ar-H), 7.84 (d,  $J = 8.5$  Hz, 4H, Ar-H).  $^{13}\text{C NMR}$  (ppm in  $\text{CDCl}_3$ , 125 MHz):  $\delta$  128.3, 130.1, 132.4, 137.6, 196.7.

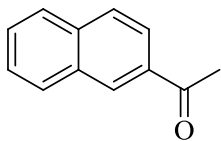

<sup>1</sup>H NMR (ppm in CDCl<sub>3</sub>, 500 MHz):  $\delta$  2.70 (s, 3H, CH<sub>3</sub>), 7.51-7.61 (m, 2H, Ar-H), 7.85 (t,  $J$  = 8.5 Hz, 2H, Ar-H), 7.94 (d,  $J$  = 8.0 Hz, 1H, Ar-H), 8.01 (d,  $J$  = 8.5 Hz, 1H, Ar-H), 8.44 (s, 1H, Ar-H). <sup>13</sup>C NMR (ppm in CDCl<sub>3</sub>, 125 MHz):  $\delta$  26.7, 123.9, 126.8, 127.8, 128.4, 128.5, 129.6, 130.2, 132.5, 134.5, 135.6, 198.1.
